# Supplementary material
Source: publisher site journal article supplement (https://www.dovepress.com/article/341342)
Supplement: Supplementary file 1 [file get_supplementary_file.php]

Table S1 Gene mutation profile

| Gene Symbol | cHGVS                 | pHGVS        | Chr | Start     | Stop      | Ref         | Call | MapLoc  | VarType | Exln_ID | Function   |
|-------------|-----------------------|--------------|-----|-----------|-----------|-------------|------|---------|---------|---------|------------|
| MYD88       | c.794T>C              | p.L265P      | 3   | 38182640  | 38182641  | T           | C    | 3p22.2  | snv     | EX5E    | missense   |
| BCL6        | c.-50+2T>C            | .            | 3   | 187463195 | 187463196 | A           | G    | 3q27.3  | snv     | IVS1    | splice-5   |
| PIM1        | c.4C>T                | p.L2F        | 6   | 37138354  | 37138355  | C           | T    | 6p21.2  | snv     | EX1     | missense   |
| PIM1        | c.29C>T               | p.A10V       | 6   | 37138379  | 37138380  | C           | T    | 6p21.2  | snv     | EX1     | missense   |
| PIM1        | c.63_65delCG          | p.A22V       | 6   | 37138413  | 37138416  | CGC         | TGT  | 6p21.2  | delins  | EX1     | missense   |
| PIM1        | c.68C>T               | p.T23I       | 6   | 37138418  | 37138419  | C           | T    | 6p21.2  | snv     | EX1     | missense   |
| PIM1        | c.83G>A               | p.G28D       | 6   | 37138548  | 37138550  | GC          | AC   | 6p21.2  | snv     | EX2     | missense   |
| PIM1        | c.88G>T               | p.E30*       | 6   | 37138553  | 37138554  | G           | T    | 6p21.2  | snv     | EX2     | nonsense   |
| PIM1        | c.97C>T               | p.P33S       | 6   | 37138562  | 37138563  | C           | T    | 6p21.2  | snv     | EX2     | missense   |
| PIM1        | c.187C>A              | p.P63T       | 6   | 37138652  | 37138654  | CC          | AC   | 6p21.2  | snv     | EX2     | missense   |
| PIM1        | c.202C>T              | p.H68Y       | 6   | 37138768  | 37138769  | C           | T    | 6p21.2  | snv     | EX3     | missense   |
| PIM1        | c.230G>A              | p.W77*       | 6   | 37138796  | 37138797  | G           | A    | 6p21.2  | snv     | EX3     | nonsense   |
| PIM1        | c.286G>A              | p.V96M       | 6   | 37138945  | 37138946  | G           | A    | 6p21.2  | snv     | EX4     | missense   |
| PIM1        | c.376G>A              | p.V126M      | 6   | 37139035  | 37139036  | G           | A    | 6p21.2  | snv     | EX4     | missense   |
| PIM1        | c.403G>A              | p.E135K      | 6   | 37139062  | 37139063  | G           | A    | 6p21.2  | snv     | EX4     | missense   |
| PIM1        | c.412G>A              | p.A138T      | 6   | 37139071  | 37139072  | G           | A    | 6p21.2  | snv     | EX4     | missense   |
| PIM1        | c.418C>T              | p.Q140*      | 6   | 37139077  | 37139078  | C           | T    | 6p21.2  | snv     | EX4     | nonsense   |
| PIM1        | c.594C>G              | p.Y198*      | 6   | 37139253  | 37139256  | CAC         | GAC  | 6p21.2  | snv     | EX4     | nonsense   |
| PRDM1       | c.849_853delTAGAAinsG | p.F283Lfs*27 | 6   | 106552883 | 106552890 | TAGA<br>AGA | GGA  | 6q21    | delins  | EX5     | frameshift |
| PCLO        | c.12601T>C            | p.S4201P     | 7   | 82544700  | 82544701  | A           | G    | 7q21.11 | snv     | EX7     | missense   |
| PCLO        | c.8258A>G             | p.D2753G     | 7   | 82582010  | 82582011  | T           | C    | 7q21.11 | snv     | EX5     | missense   |
| PCLO        | c.1279C>A             | p.L427I      | 7   | 82784677  | 82784678  | G           | T    | 7q21.11 | snv     | EX2     | missense   |
| FOXO1       | c.497C>T              | p.A166V      | 13  | 41239852  | 41239853  | G           | A    | 13q14.1 | snv     | EX1     | missense   |
| RB1         | c.2106+2T>            | .            | 13  | 49033970  | 49033972  | TA          | GA   | 13q14.2 | snv     | IVS20   | splice-5   |
| CD79B       | c.587A>C              | p.Y196S      | 17  | 62006797  | 62006798  | T           | G    | 17q23.3 | snv     | EX5     | missense   |
| TCF3        | c.1142G>A             | p.S381N      | 19  | 1619803   | 1619804   | C           | T    | 19p13.3 | snv     | EX14    | missense   |
| SMARC       | c.3404G>A             | p.R1135Q     | 19  | 11141426  | 11141428  | GG          | AG   | 19p13.2 | snv     | EX25    | missense   |

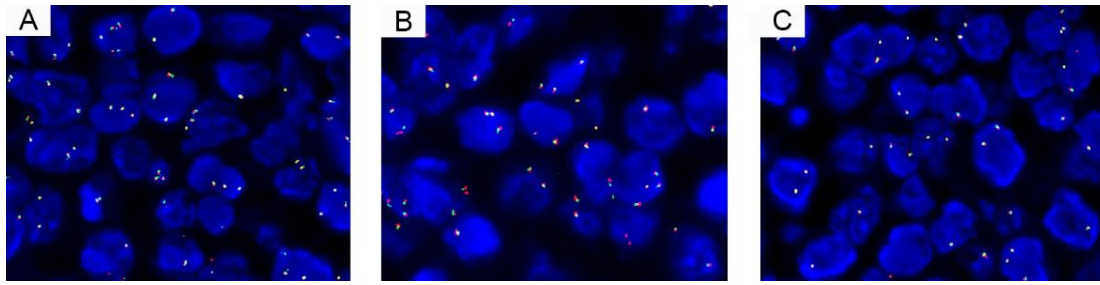

Figure S1 *BCL-2* (A), *BCL-6* (B), and *MYC* (C) gene rearrangements using FISH were all negative.
